# Supplementary material
Source: publisher figshare collection journal article supplement (https://frontiersin.figshare.com/ndownloader/files/34338338)
Supplement: Supplementary file [file 34338338]

## Supplementary Material

### Supplementary Tables

**Table 1.** Anthropometric and physiological data for female (n = 6) and male (n = 6) participants. Data are displayed as means  $\pm$  standard deviation.

|                                                                               | Female (n=6)    | Male (n=6)      | All (N = 12)    |
|-------------------------------------------------------------------------------|-----------------|-----------------|-----------------|
| Age (years)                                                                   | 30.5 $\pm$ 6.7  | 28.5 $\pm$ 3.7  | 29.5 $\pm$ 5.3  |
| Height (cm)                                                                   | 161.8 $\pm$ 5.7 | 173.9 $\pm$ 7.5 | 167.9 $\pm$ 8.9 |
| Weight (kg)                                                                   | 60.5 $\pm$ 5.1  | 81.3 $\pm$ 14.5 | 70.9 $\pm$ 15.0 |
| BF (%)                                                                        | 20.1 $\pm$ 3.4  | 10.0 $\pm$ 3.8  | 15.0 $\pm$ 6.3  |
| VO <sub>2</sub> peak (mL $\cdot$ min <sup>-1</sup> $\cdot$ kg <sup>-1</sup> ) | 43.2 $\pm$ 3.6  | 54.3 $\pm$ 3.4  | 48.7 $\pm$ 6.7  |

N= 12. cm= centimetres, kg = kilograms; BF (%) = body fat percentage; VO<sub>2</sub>peak = peak oxygen consumption; ml = milliliters, min = minute

**Table 2.** Repetitions performed during BW-HIIE (N = 12).

| Exercise         | Set 1        | Set 2        | <i>P</i> -value | <i>g</i> |
|------------------|--------------|--------------|-----------------|----------|
| High knees       | 185 $\pm$ 16 | 183 $\pm$ 22 | 0.770           | 0.100    |
| Squat jumps      | 50 $\pm$ 6   | 47 $\pm$ 8   | 0.022*          | 0.410    |
| Scissor Jacks    | 154 $\pm$ 13 | 153 $\pm$ 10 | 0.481           | 0.083    |
| Jumping Lunges   | 55 $\pm$ 10  | 51 $\pm$ 11  | 0.527           | 0.367    |
| Modified Burpees | 24 $\pm$ 3   | 22 $\pm$ 4   | 0.076           | 0.546    |

*g* = Hedges's *g*, \**P* < 0.05 significantly lower compared to the second set.
